# Supplementary material for: Combined royal jelly 10-hydroxydecanoic acid and aspirin has a synergistic effect against memory deficit and neuroinflammation
Source: Royal Society of Chemistry journal article supplement (doi:10.1039/d1fo02397g), 2022-01-01
Supplement: d1fo02397g1.pdf [file d1fo02397g1.pdf]

## Supplementary Figure 1

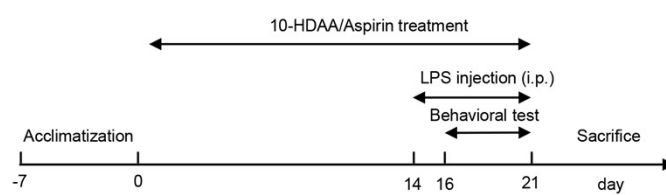

**Supplementary Figure 1** The timeline of treatments and behavioral test.

## Supplementary Figure 2

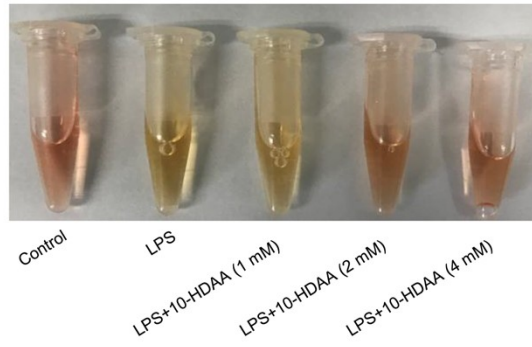

**Supplementary Figure 2** The color of cell culture medium after different treatments.

## Supplementary Figure 3

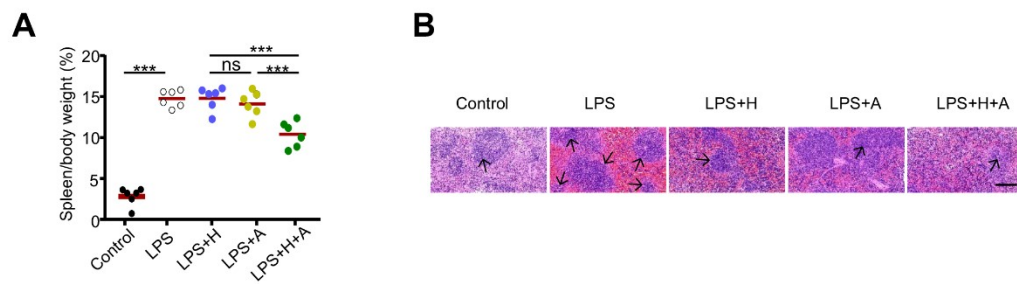

**Supplementary Figure 3** Graph shows the ratio of spleen/ body weight of mice in each group (A). The infiltration of immune cells in spleen (B) was examined by H&E staining, scale bar=250  $\mu$ m.

## Supplementary Figure 4

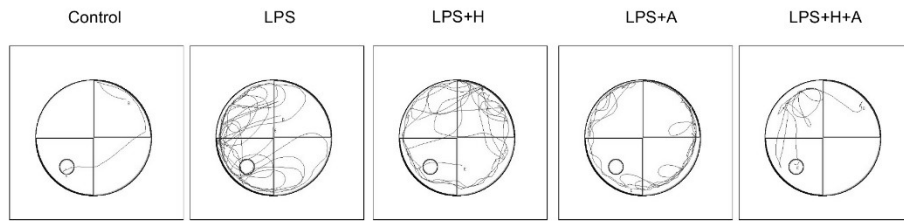

**Supplementary Figure 4** Representative path tracking in the acquisition trial with a hidden platform.
